# Supplementary material for: Construction of a dual-signal molecularly imprinted photoelectrochemical sensor based on bias potential control for selective sensing of tetracycline
Source: Royal Society of Chemistry journal article supplement (doi:10.1039/d2nj06137f), 2023-01-01
Supplement: d2nj06137f5.pdf [file d2nj06137f5.pdf]

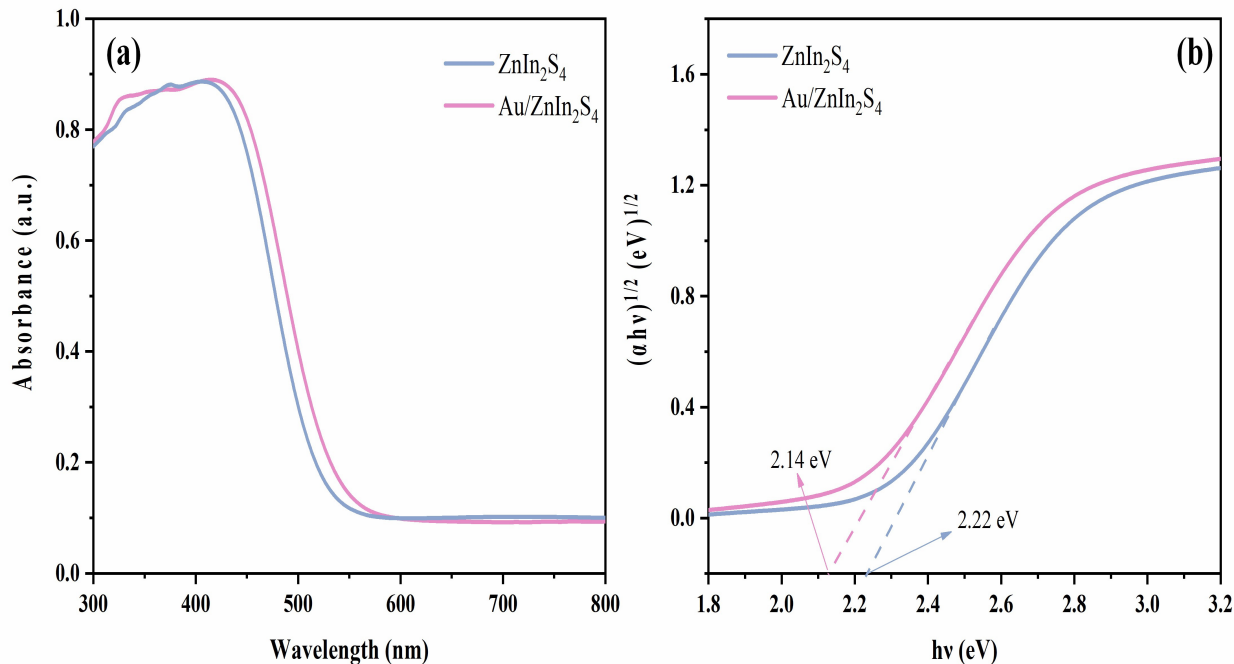

Fig. S4. UV-vis diffuse reflectance spectra (a) of ZnIn<sub>2</sub>S<sub>4</sub> and Au/ ZnIn<sub>2</sub>S<sub>4</sub>; the band-gap energies (b) of ZnIn<sub>2</sub>S<sub>4</sub> and Au/ ZnIn<sub>2</sub>S<sub>4</sub> samples.
