# Supplementary material for: Construction of a dual-signal molecularly imprinted photoelectrochemical sensor based on bias potential control for selective sensing of tetracycline
Source: Royal Society of Chemistry journal article supplement (doi:10.1039/d2nj06137f), 2023-01-01
Supplement: d2nj06137f8.pdf [file d2nj06137f8.pdf]

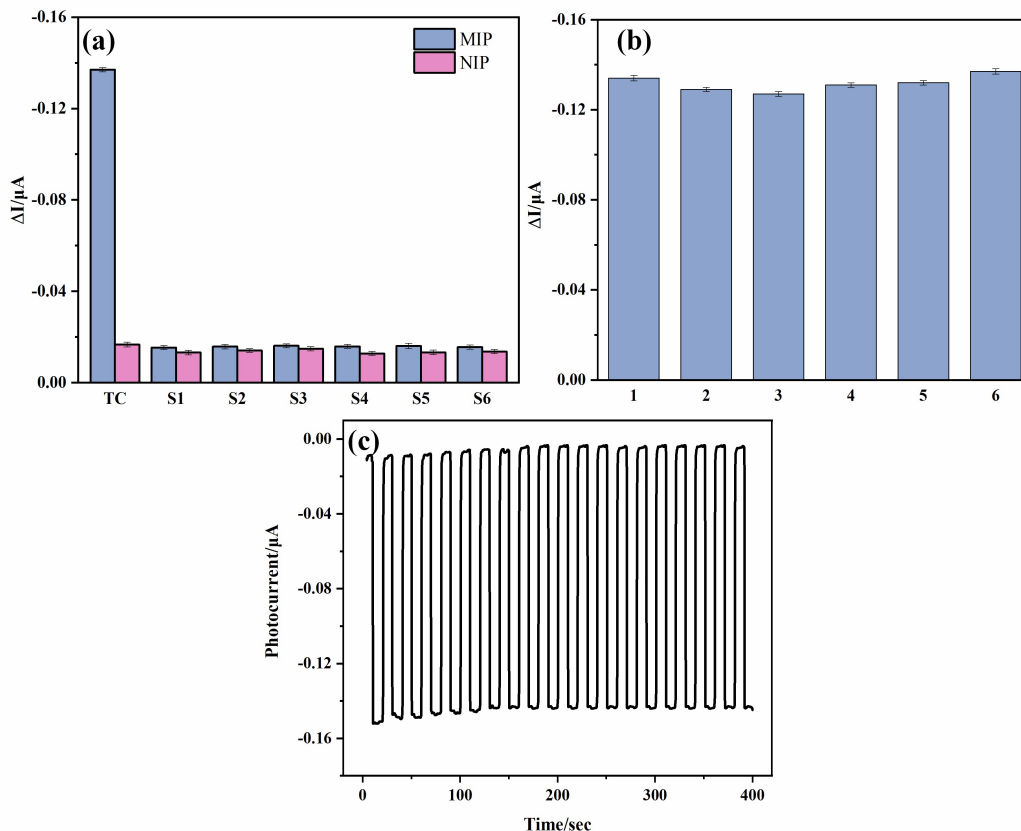

Fig. S7. Selectivity (a) of MIP-PEC and NIP-PEC sensor for TC and its analogues(S1-S6, AM, OTC, CAP, GM, KANA, CIP). Stability analysis (b) and reproducibility analysis (c) of MIP-PEC sensor. All the photocurrent tests were performed at abias of -0.3 V.
