# Supplementary figures and images for: Construction of a dual-signal molecularly imprinted photoelectrochemical sensor based on bias potential control for selective sensing of tetracycline
Source: Royal Society of Chemistry journal article supplement (doi:10.1039/d2nj06137f), 2023-01-01

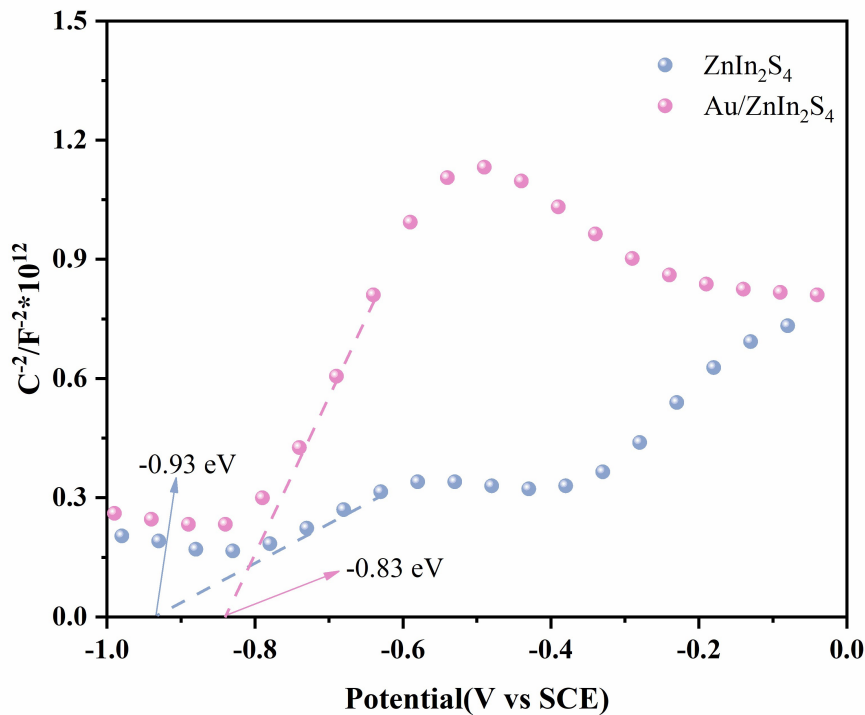

Fig. S5. M-S plots of  $ZnIn_2S_4$  and  $Au/ZnIn_2S_4$  samples.

Supplement: d2nj06137f6.pdf [file d2nj06137f6.pdf]
